# Supplementary material for: Dodecylated lignin-g-PLA for effective toughening of PLA
Source: Royal Society of Chemistry journal article supplement (doi:10.1039/c6gc01341d), 2016-01-01

## Dodecylated lignin-g-PLA for effective toughening of PLA

Wei Ren, Xiaoyong Pan, Guan Wang, Weiren Cheng and Ye Liu\*

*Institute of Materials Research & Engineering, A\*STAR 2 Fusionopolis Way, #08-03, Innovis, Singapore 138634. E-mail: ye-liu@imre.a-star.edu.sg*

### Supporting information:

1. Alkylated carboxylic OH percentage (%) and total alkylated OH percentage (%) of lignin:

3.33 mmol/g of phenolic OH of alkaline lignin was conjugated with dodecane:

$$W_{\text{dodecane}} = 3.33 \times 169/1000 = 0.56 \text{ (g)} \text{ (where 169 is the molecular weight of } -C_{12}H_{25})$$

Assuming x mmol/g of carboxylic OH and no aliphatic OH were alkylated:

$$\frac{0.93 - x}{x \times \frac{169}{1000} + 0.56 + 1} = 0.14$$

Therefore: x = 0.70 mmol/g.

$$\text{alkylated carboxylic OH\%} = 0.70/0.93 \times 100\% = 77\%.$$

total alkylated OH%:

$$(0.70 + 3.3)/6.92 \times 100\% = 58\%.$$

2. Figure S1. DSC thermogram of dodecylated lignin:

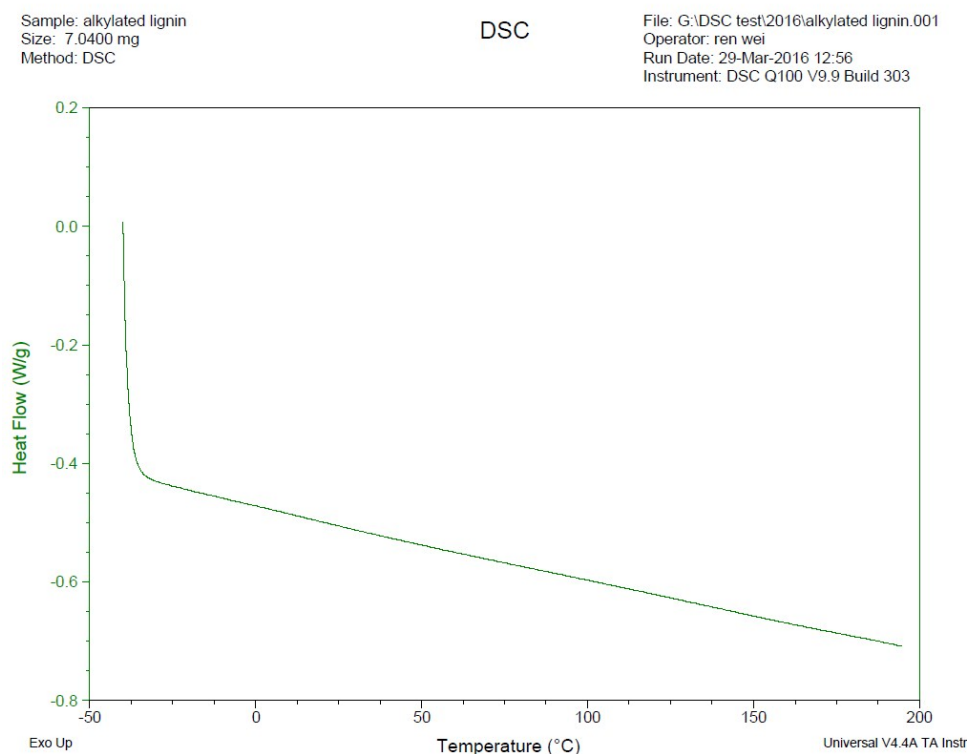

3. Lignin% (w/w) in lignin/PLA blends:

Lignin% (w/w) in dodecylated lignin was determined by analysis of  $^{31}\text{P}$  NMR of alkylated lignin:

$$\text{Lignin\%} = 1/(0.58 \times 169/1000 + 1) \times 100\% = 59.5\%$$

Lignin%(w/w) in lignin/PLA blend =  $0.595/(1+1.47 \text{ (total OH mmol/g in dodecylated lignin)} \times M_n \text{ of PLA grafted chain}/1000) \times 100\%$  (assuming all the OH were grafted with PLA)

With  $M_n$ (PLA chain) being determined from  $^1\text{H}$  NMR of lignin-g-PLA, total OH mmol/g in dodecylated lignin being determined from  $^{31}\text{P}$  NMR of dodecylated lignin.

4. Figure S2. GPC profiles of dodecylated lignin-g-PLA sample 1 in Table 2 using ELS and UV detector, respectively.

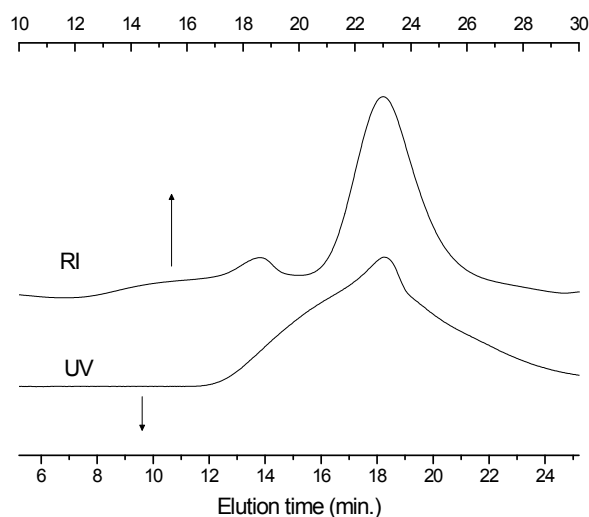

Figure S3: GPC profiles of PLA using ELS and UV detector, respectively

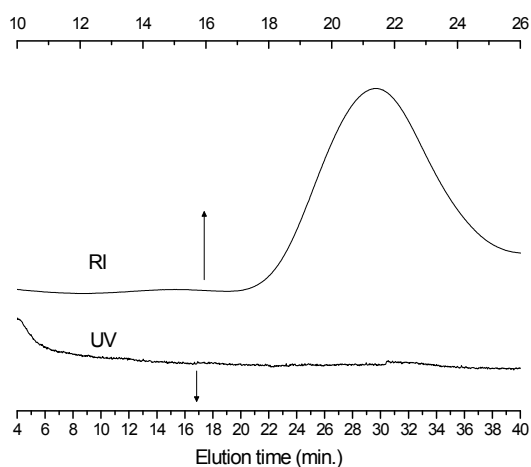

5. Figure S4. Photos of lignin/PLA blend samples 7 to 10 in Table 3 (from left to right) and 5% alkali lignin-g-PLA/PLA blend.

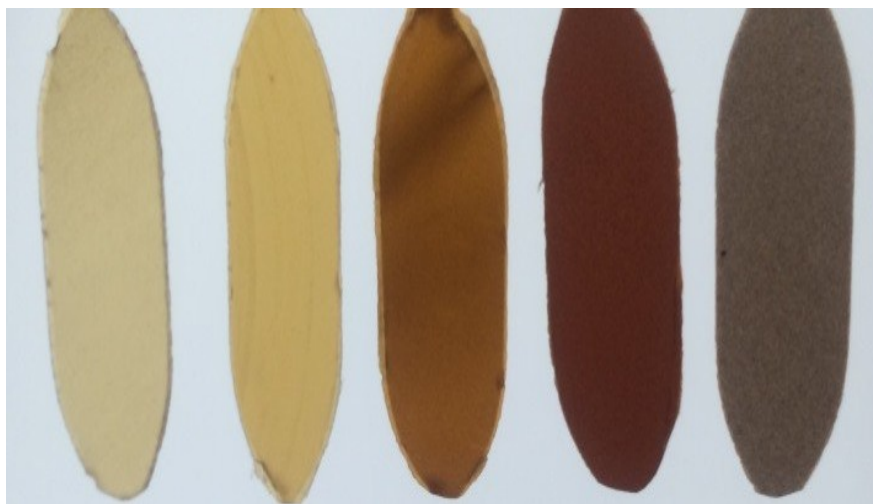

6. Figure S5. Typical DSC thermogram of selectively dodecylated lignin-g-PLA (sample 1 in Table 2):

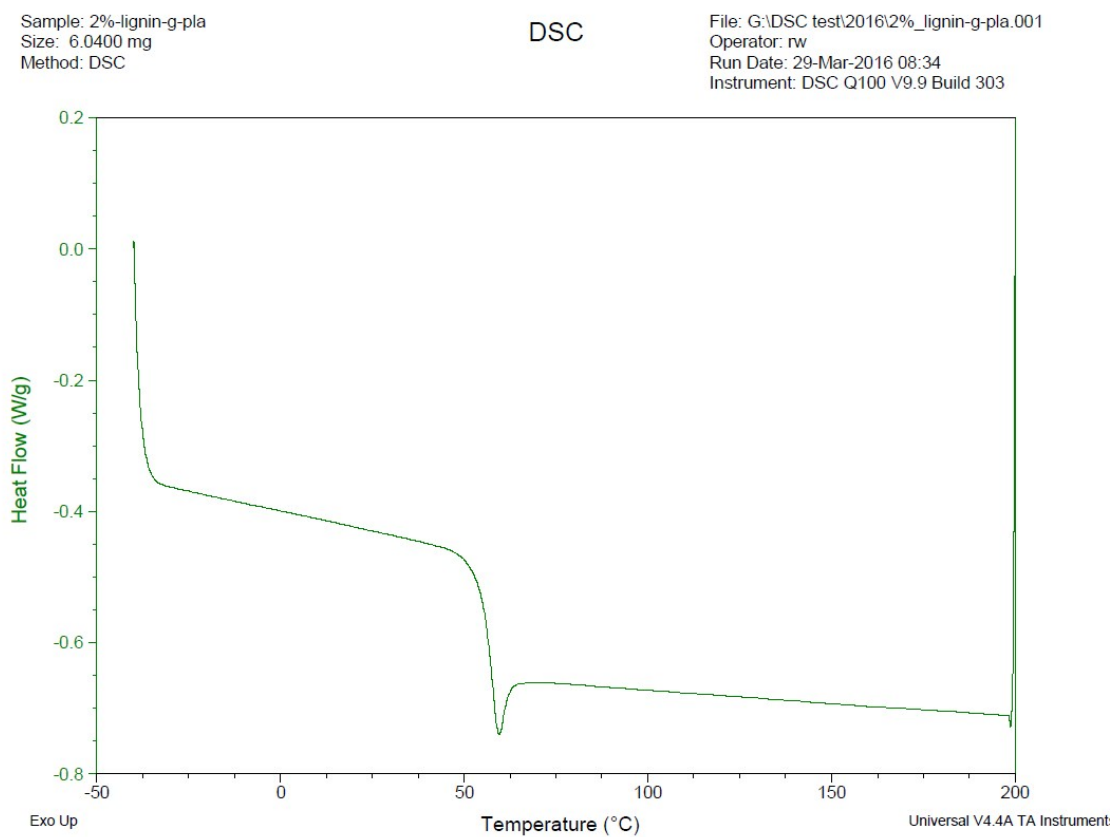

7. Figure S6. TGA thermograms of PLA and lignin/PLA blend samples 7 to 10 in Table 3.

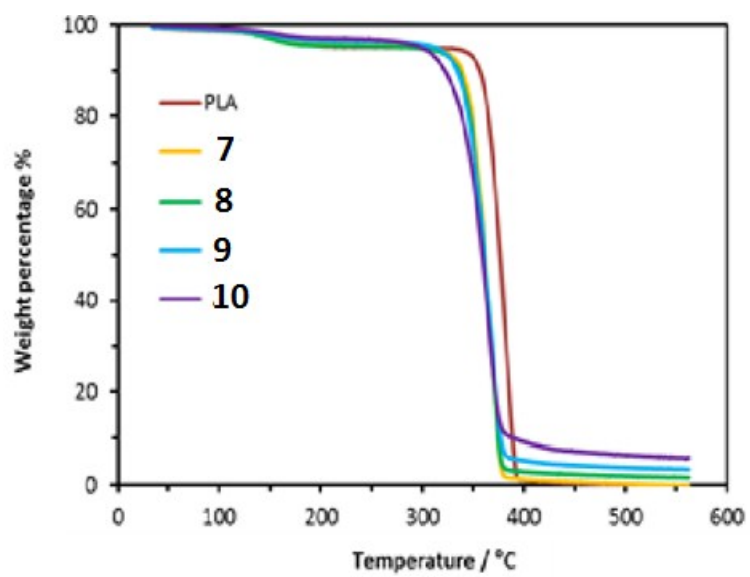

Supplement: c6gc01341d1.pdf [file c6gc01341d1.pdf]
